# Supplementary material for: Design and synthesis of the active part of a potential molecular motor
Source: Royal Society of Chemistry journal article supplement (doi:10.1039/b415214j), 2005-01-01

## Supporting information

### Design and synthesis of the active part of a potential molecular motor

Alexandre Carella, Gwénaél Rapenne and Jean-Pierre Launay

*NanoSciences Group, CEMES-CNRS, 29 rue Jeanne Marvig, BP 94347, F-31055 Toulouse Cedex 4, France.*

$^1\text{H}$ -NMR of **3** : Full spectrum and zoom on the ferrocene region (4.1 - 4.6 ppm) and on the aromatic region (6.9 - 8.1 ppm)

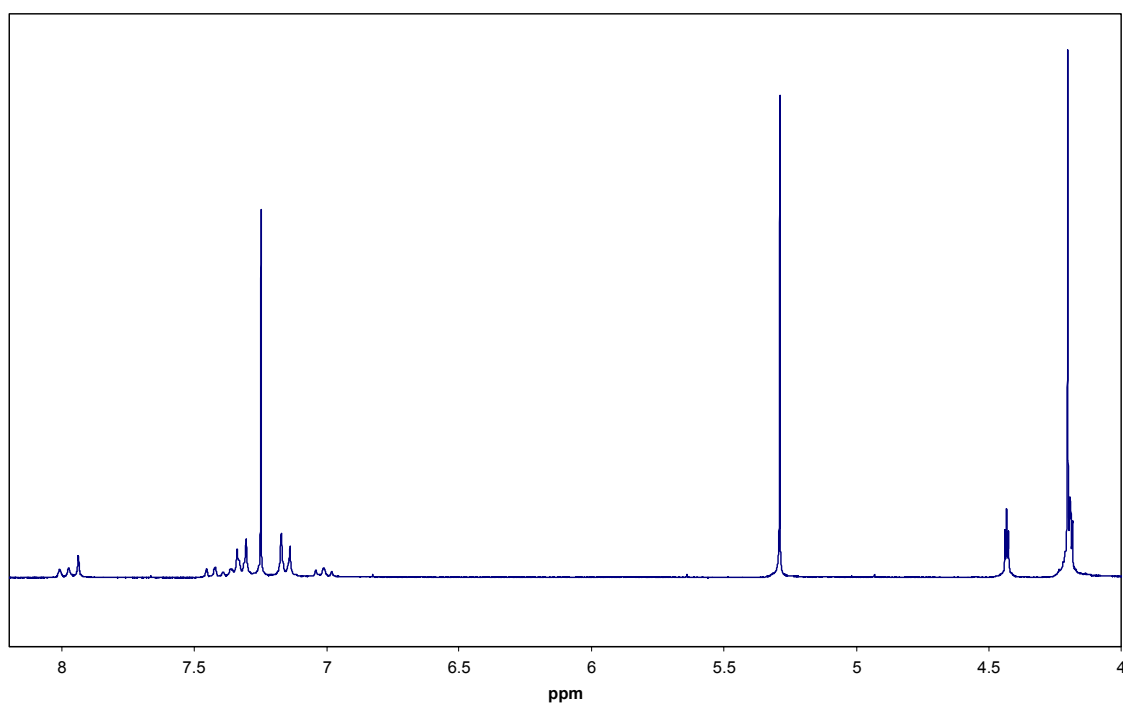

Aromatic signals

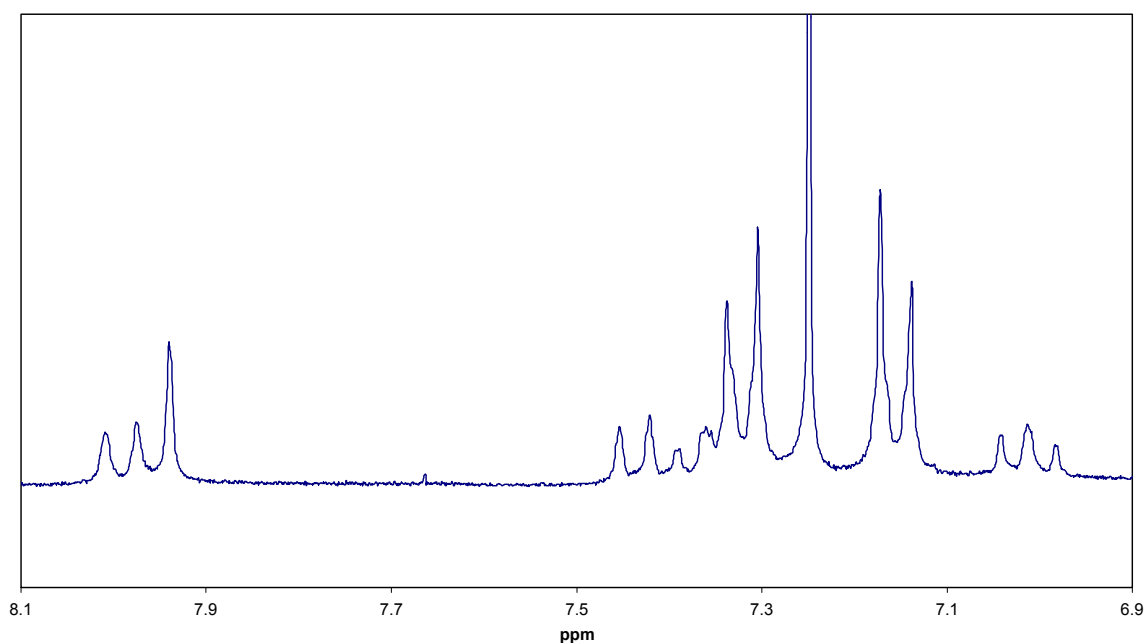

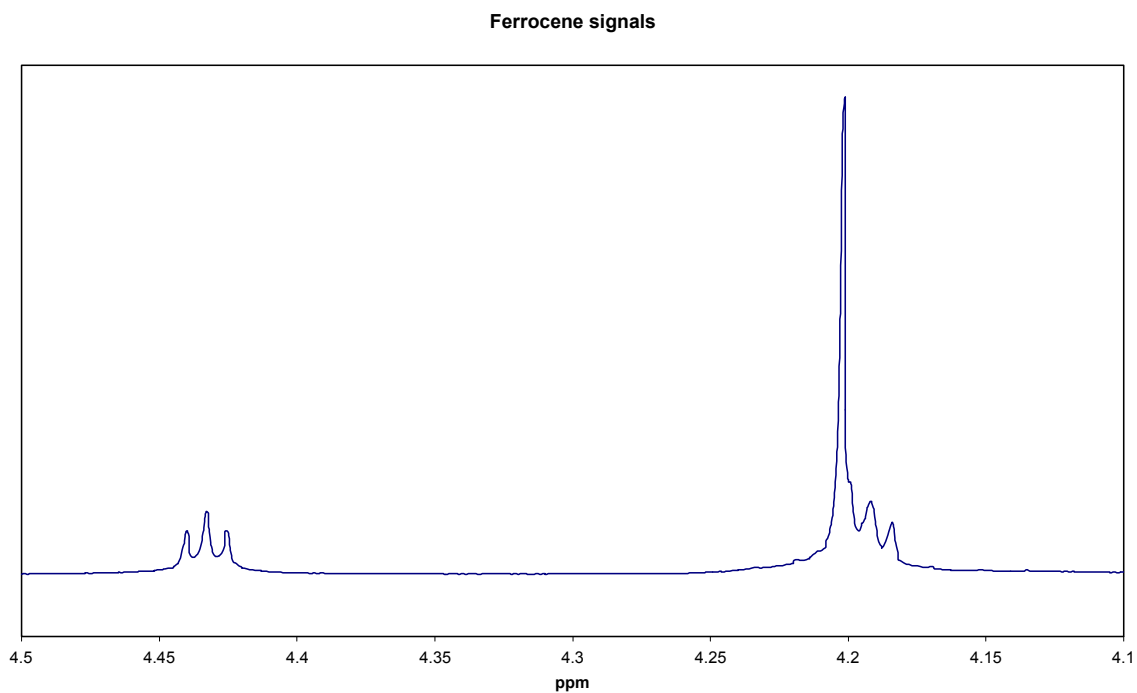

Cyclic voltammetry of **3** ( $\text{CH}_2\text{Cl}_2$ ,  $^n\text{Bu}_4\text{NPF}_6$ , Pt working and counter electrode, in V vs SCE). All waves were reversible. The sweep rate was  $100 \text{ mV}\cdot\text{s}^{-1}$ .

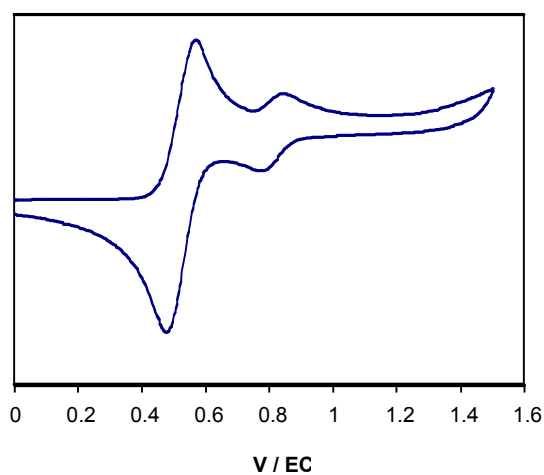

Supplement: b415214j.pdf [file b415214j.pdf]
